# Supplementary material
Source: PubMed Central journal article supplement (PMC5100758)
Supplement: supp_pp.16.01189_PP2016-01189R1_Supplemental_Material.pdf [file supp_pp.16.01189_PP2016-01189R1_Supplemental_Material.pdf]

## **HvNramp5 mediates uptake of cadmium and manganese, but not iron in barley**

Dezhi Wu, Naoki Yamaji, Miki Yamane, Miho Kashino, Kazuhiro Sato and Jian Feng Ma\*

Institute of Plant Science and Resources, Okayama University, Chuo 2-20-1, Kurashiki 710-0046,  
Japan

\*Corresponding author E-mail: maj@rib.okayama-u.ac.jp

### **Supplemental Data**

**Supplemental Figure S1.** Sequence, gene and protein structure, and phylogenetic analysis of *HvNramp5*.

**Supplemental Figure S2.** Gene expression level in the roots of *HvNramp5* RNAi lines and WTs.

**Supplemental Figure S3.** Concentration of Cu and Zn in the *HvNramp5* RNAi lines at different Mn concentrations.

**Supplemental Figure S4.** Phenotypic analysis of *HvNramp5* RNAi lines at different Cd concentrations.

**Supplemental Figure S5.** Phenotypic analysis of *HvNramp5* RNAi lines at different Fe concentrations.

A

**The full-length cDNA (1638 bp):**

```

ATGGAGATCGAGAGGGAGGCGCGGCCAGCGAGAGGGGGAGGAGCTGGCGAGCCAAC
CCCGCGGCCCGCAAGATGCGCAGGGTGAGAAGAAGTTGGAGACGGCGATGAGACG
TTCGTC AAGGAGCCGGCATGGAAGCGGTTCTCTCCCATGTTGGACCAGGGTTCATGGT
GTCCTCGCCTACCTGGATCCTGGCAACTTGGAGACGGACTGCAAGCCGGAGCCAAT
CACAGATATGAGCTCCTCTGGGTGATTCTGATTGGCCTCATCTTCGCGTGATCATACA
GTCGCTAGCAACCTTGGCGTGGTTACGGGAAAGCATCTCGCCGAGATGCAAG
AGCGAGTATCCGAAGCCCGTGATGATCTGCCCTGGCTTCGCGGAGGTGGCGGTGAT
CGCCGCCGATATCCCGAAGTGATCGGGACGGCCTTCGCTTCTACCTTGTTCGCA
TCCCGGTGTGGATCGGGTCTAATACCGGCTCCAGCAGCTCCTCCTCTCGGCCTG
CAAAGATACGGGGTGGGAAGCTGGAGTTCCTCATCTCAATGCTCGTCTTCGTCATGGC
GGCGTGTCTTTCGGGAAGCTGAGCATAGTGAAGCTCCGGCGAAGGAGGTCCTGAAA
GGGCTGTTCAATCCCAAGCTCAAGGAAATGGCGCCACCGCAGACGCCATTGCCCTCC
TTGGAGCTCTAGTTATGCCTCACAACCTGTTCTTGCATTGCGCGTGGTGTGTCCAGA
AAGACGCCCTCGTTCGGTAAGAGGAATCAAGGACGCTTGCAGGTTCTTCTCTACGAGA
CGGATTCGCGCTGTTCTGGCGTGCATCAACATCGCCGCTCGTCTCGTGTCCGGG
ACTGTCTGCTTCGGGAAAACCTCTCGCGGAGGACATCGACAATGCAAGTACGCTCA
GCCTGGACAACTCCTCGTTCCTGCTCAAGAAGCTGCTGGGCGAGTTCGAGCTCGATCGT
TACGGGGTGGCGCTGTTGGCGTCAGGGCAGAGCTCGACCATACCGGCACATACGCCG
GCCAGTACATCATGCAGGGTCTTGGACATCAAGATGAAGACGTGGCTGAGGAACCT
GATGACGCGCTGCATCGCCATTGCGCCAGCCTAGTCTGCTCCATCATCGGCGGGTCA
ATGGCGCCGCGCCCTCATCATCATCGCTCGATGATGACTGCTTTGAGTGCATTC
GCACTCATCCCGCTTCTCAAGTTCAGCAGCAGCAGCAGCAAGATGGGCCCGCACAAGA
ACTCCATCTACATCATCGTGTCTCGTGGACGCTTGGGCTGATGCTCATCGGCATCAAC
GTCTACTTCTACGACGAGCTTCATGGGGTGGCTCATCAACAGCTCGTGCACACGTA
CGCAAGGTGCTGGTCGAGTCTGCTGCTGCCCCGCTGATGCTCGTCTACCTCGTCTG
TCGTACTCTACCTCAGTTCAGGAAGGACACCGCTGTCACCTTCGTCGCCGACTCGTGCAAG
GCCGACGCCGAGAAGGGCGGGCGGCAGCGGGGAGGACGACGACGAGCCCGTGCCT
TACCGTGAGGACCTCGCAGACATACCGCTCCCGCCACAGCACTAGAGATATGCAGT
AG
  
```

**Amino acids (545aa):**

```

MEIEREAPGSRGRSWRANPAAQDAQGEKKFGDGDTEFVKEPAWKRFSLHVGPGFMVSL
AYLDPGNLETDLQAGANHR YELLWVILIGLIFALI IQSLAANLGVVTGKHLAEICKSEYPKPV
MICLWLLAEVAVIAADIPEVIGTAFAYLLFRIPVWIGVLITGSSLLLLGLQRYGVRKLEFLIS
MLVFMMAACFFGELSIVKPPAKEVLKGLFIPKLGNGATADAIALLGALVMPHNLFLHSALV
LSRKT PSSVRG IKDACRFFLYESGFALFVALLINIAVVS VSGTVCFGENLSAEDIDKCSDSL
NSSFLLKNVLGRSSSIVYGVALLASGQSSTITGTYAGQYIMQGFLDIKMKTWLRLNLMTRCIAI
APSLVVSIIIGGSNGAGRLIIIASMILSFELPFALIPLLKFSSSSSKMGPHKNSIYIIVFSWTLGLMLI
GINVYFLSTFSFMGWLINSSLPTYAKVLVGVVVCPMLVYLVAVVYLFRKDDTVTVFVADSC
KADA EKAAGSGEDDDEPVYREDLADIPLAHSTRDMQ
  
```

B

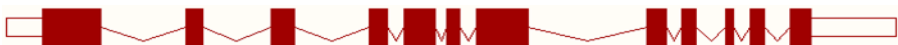**Fig. S1 Sequence, gene and protein structure, and phylogenetic analysis of *HvNramp5***

A, Full-length cDNA sequence of *HvNramp5* and deduced amino acid sequences from barley cultivar Golden Promise. B, Schematic gene structure of *HvNramp5*. C, Phylogenetic tree of *HvNramp5* and seven Nramp proteins in rice. D, Alignment of amino acid sequence between *HvNramp5* and *OsNramp5*. Predicted transmembrane domains in *HvNramp5* are marked with black lines.

C

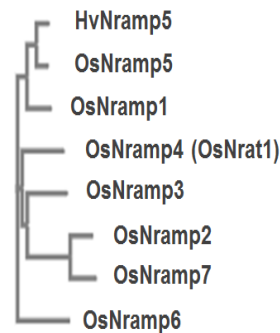

D

|          |                                                                   |     |
|----------|-------------------------------------------------------------------|-----|
| HvNramp5 | MEIEREAPGSRG--RSWRANPAAQDAQGEKKFGDGDTEFVKEPAWKRFSLHVGPGFMVS       | 59  |
| OsNramp5 | MEIERES--SERGSISWRASAAHQDQA---KKLDADDQLLMKEPAWKRFSLHVGPGFMVS      | 55  |
|          | ***** * * * * * * * * * * * * * * * * * * * * * * * * * * * * * * |     |
| HvNramp5 | LAYLDPGNLETDLQAGANHR YELLWVILIGLIFALI IQSLAANLGVVTGKHLAEICKSEY    | 119 |
| OsNramp5 | LAYLDPGNLETDLQAGANHR YELLWVILIGLIFALI IQSLAANLGVVTGRHLAEICKSEY    | 115 |
|          | ***** * * * * * * * * * * * * * * * * * * * * * * * * * * * * * * |     |
| HvNramp5 | PKFVMICLWLLAEVAVIAADIPEVIGTAFAYLLFRIPVWIGVLITGSSLLLLGLQRYG        | 179 |
| OsNramp5 | PKFVKIFLWLLAEVAVIAADIPEVIGTAFAFNLPHIPVWIGVLTGTSTLLGLQRYG          | 175 |
|          | ***** * * * * * * * * * * * * * * * * * * * * * * * * * * * * * * |     |
| HvNramp5 | VRKLEFLISMLVFMMAACFFGELSIVKPPAKEVLKGLFIPKLGNGATADAIALLGALVM       | 239 |
| OsNramp5 | VRKLEFLISMLVFMMAACFFGELSIVKPPAKEVVKGLFIPRLNGDGATADAIALLGALVM      | 235 |
|          | ***** * * * * * * * * * * * * * * * * * * * * * * * * * * * * * * |     |
| HvNramp5 | PHNLFLHSALVLSRKT PSSVRG IKDACRFFLYESGFALFVALLINIAVVS VSGTVCFGEN   | 299 |
| OsNramp5 | PHNLFLHSALVLSRKT PASVRG IKDGRFLYESGFALFVALLINIAVVS VSGTACSSAN     | 295 |
|          | ***** * * * * * * * * * * * * * * * * * * * * * * * * * * * * * * |     |
| HvNramp5 | LSAEDIDKCSDSL DNSFLLKNVLGRSSSIVYGVALLASGQSSTITGTYAGQYIMQGFL       | 359 |
| OsNramp5 | LSQEDADKCANLSLDTSSFLLKNVLGKSSATVYGVALLASGQSSTITGTYAGQYIMQGFL      | 355 |
|          | ***** * * * * * * * * * * * * * * * * * * * * * * * * * * * * * * |     |
| HvNramp5 | DIKMKTWLRLNLMTRCIAIAPSLVVSIIIGGSNGAGRLIIIASMILSFELPFALIPLLKFS     | 419 |
| OsNramp5 | DIRMRKWLRLNLMTRTIIAPSLIVSIIIGGSNGAGRLIIIASMILSFELPFALIPLLKFS      | 415 |
|          | ***** * * * * * * * * * * * * * * * * * * * * * * * * * * * * * * |     |
| HvNramp5 | SSSKMGPHKNSIYIIIVFSWTLGLMLIGINMYFLSTFSFMGWLINSSLPTYAKVLVGVVVCP    | 479 |
| OsNramp5 | SKSKMGPHKNSIYIIIVFSWFLGLLIGINMYFLSTFSFMGWLHNDLPKYANVLVGAAVFP      | 475 |
|          | ***** * * * * * * * * * * * * * * * * * * * * * * * * * * * * * * |     |
| HvNramp5 | LMLVYLVAVVYLTFRKDIVVTVFVADS---CKDAEKA--AGSGEDDDEPVYREDLADIP       | 535 |
| OsNramp5 | FMLVYTVAVVYLTIRKDSVTVFVADSSLAAVVDAEKADAGDLAVDDDEPLPYRDDLADIP      | 535 |
|          | **** * * * * * * * * * * * * * * * * * * * * * * * * * * * * * *  |     |
| HvNramp5 | LPAHSTRDMQ                                                        | 545 |
| OsNramp5 | LPR-----                                                          | 538 |
|          | **                                                                |     |

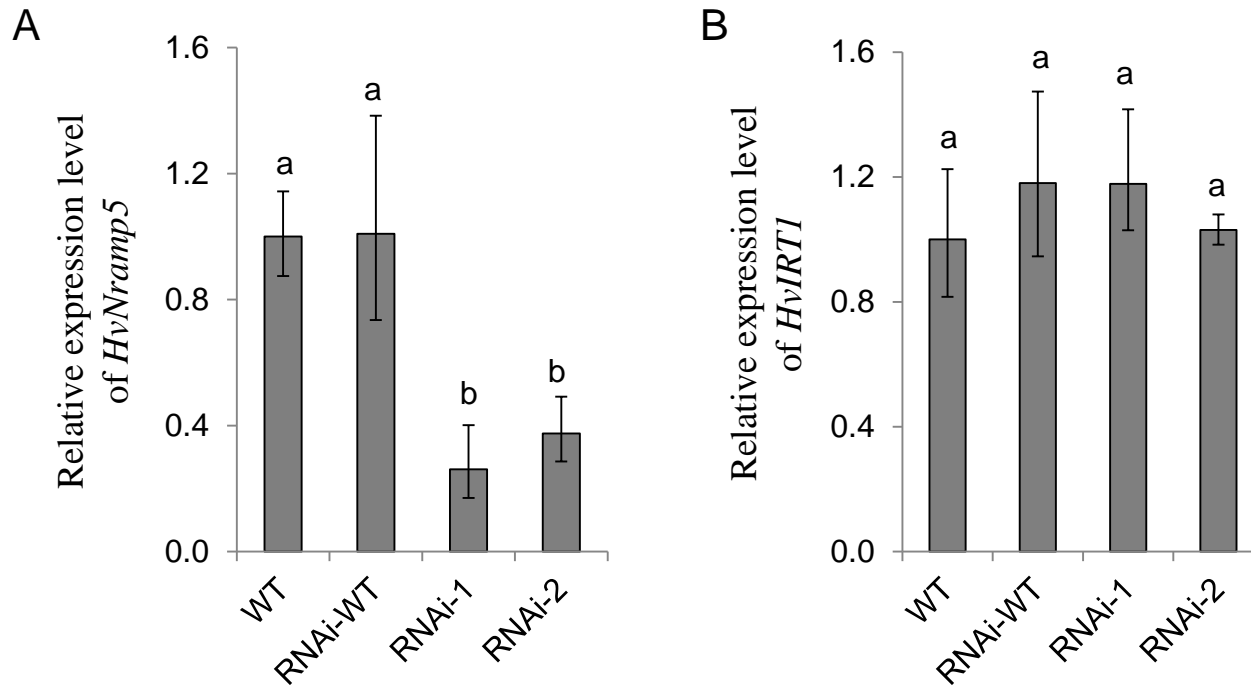

**Fig. S2 Gene expression level in the roots of *HvNramp5* RNAi lines and WTs.**

A-B, Relative expression level of *HvNramp5* (A) and *HvIRT1* (B) in the roots. Roots of two *HvNramp5* RNAi lines, the homozygous wild type from the RNAi population (RNAi-WT) and wild-type barley (WT, cv. Golden Promise) were sampled for RNA extraction and expression analysis by quantitative RT-PCR. Expression relative to WT is shown. Data are means  $\pm$  SD of three biological replicates and different small letter indicates significant difference at  $p < 0.05$  by Tukey's test.

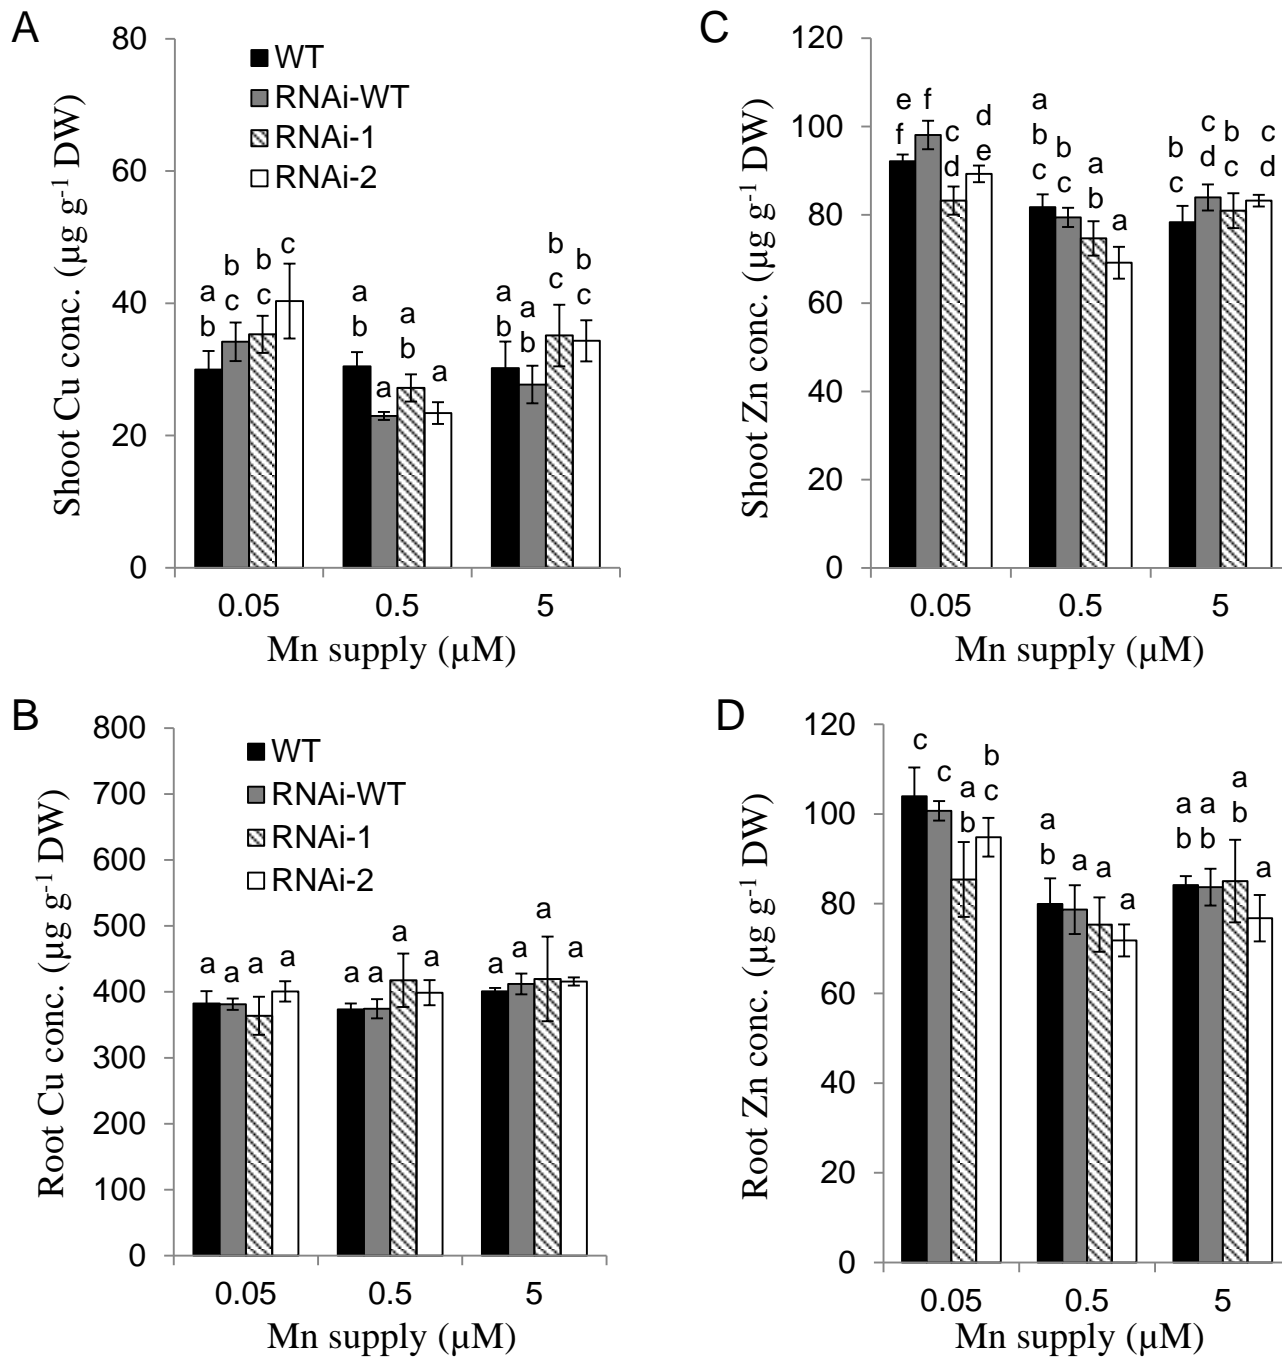

**Fig. S3 Concentration of Cu and Zn in the *HvNramp5* RNAi lines at different Mn concentrations**  
 Wild-type (WT) barley (cv. Golden Promise), the homozygous wild type (RNAi-WT) and two homozygous transgenic RNAi lines (RNAi-1, RNAi-2) derived from two independent events were cultivated in a nutrient solution containing 0.1, 0.5 or 1  $\mu\text{M}$  Cd for 14 d. The concentration of Cu (A, B) and Zn (C, D) in the shoots (A, C) and roots (B, D) was determined by ICP-MS. Data are means  $\pm$  SD of three biological replicates and different small letter indicates significant difference at  $p < 0.05$  by Tukey's test.

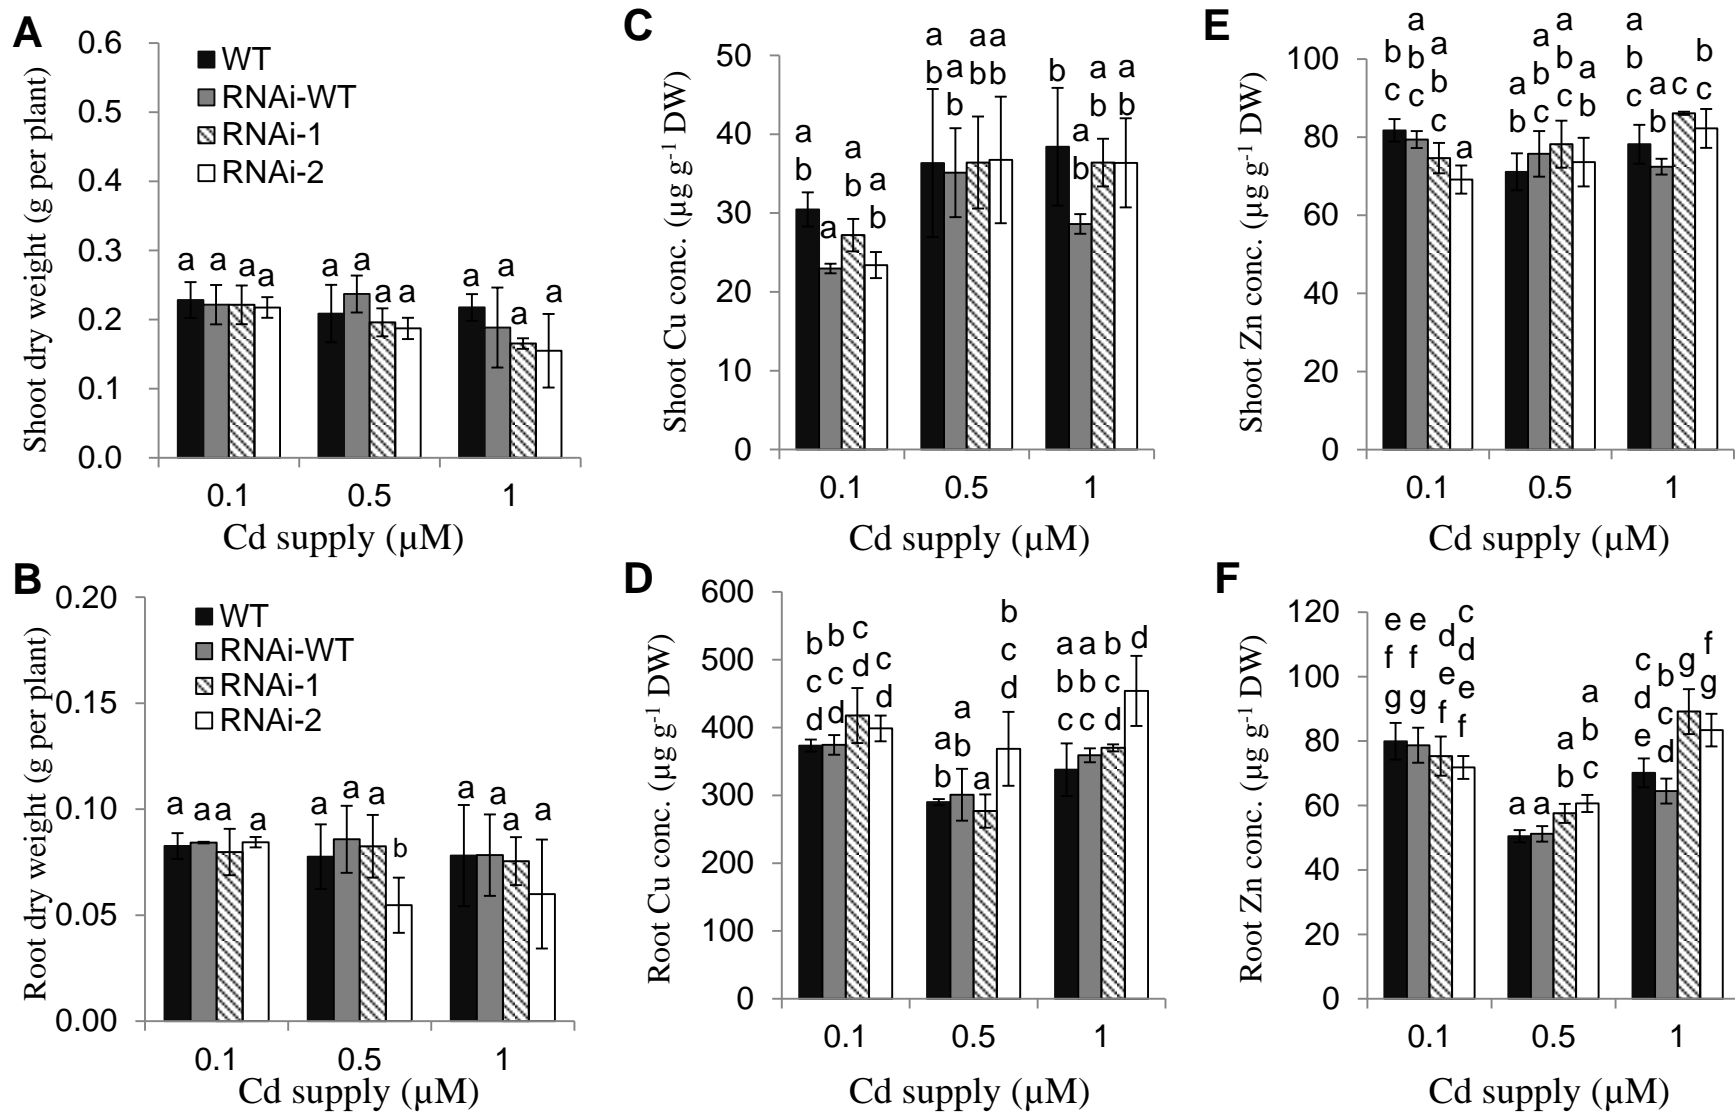

**Fig. S4 Phenotypic analysis of *HvNramp5* RNAi lines at different Cd concentrations**

Wild-type (WT) barley (cv. Golden Promise), the homozygous wild type (RNAi-WT) and two homozygous transgenic RNAi lines (RNAi-1, RNAi-2) derived from two independent events were cultivated in a nutrient solution containing 0.1, 0.5 or 1  $\mu\text{M}$  Cd for 14 d. Dry weight of the roots (A) and shoots (B) was recorded. Concentration of Cu (C, D) and Zn (E, F) in the shoots (C, E) and roots (D, F) was determined by ICP-MS. Data are means  $\pm$  SD of three biological replicates and different small letter indicates significant difference at  $p < 0.05$  by Tukey's test.

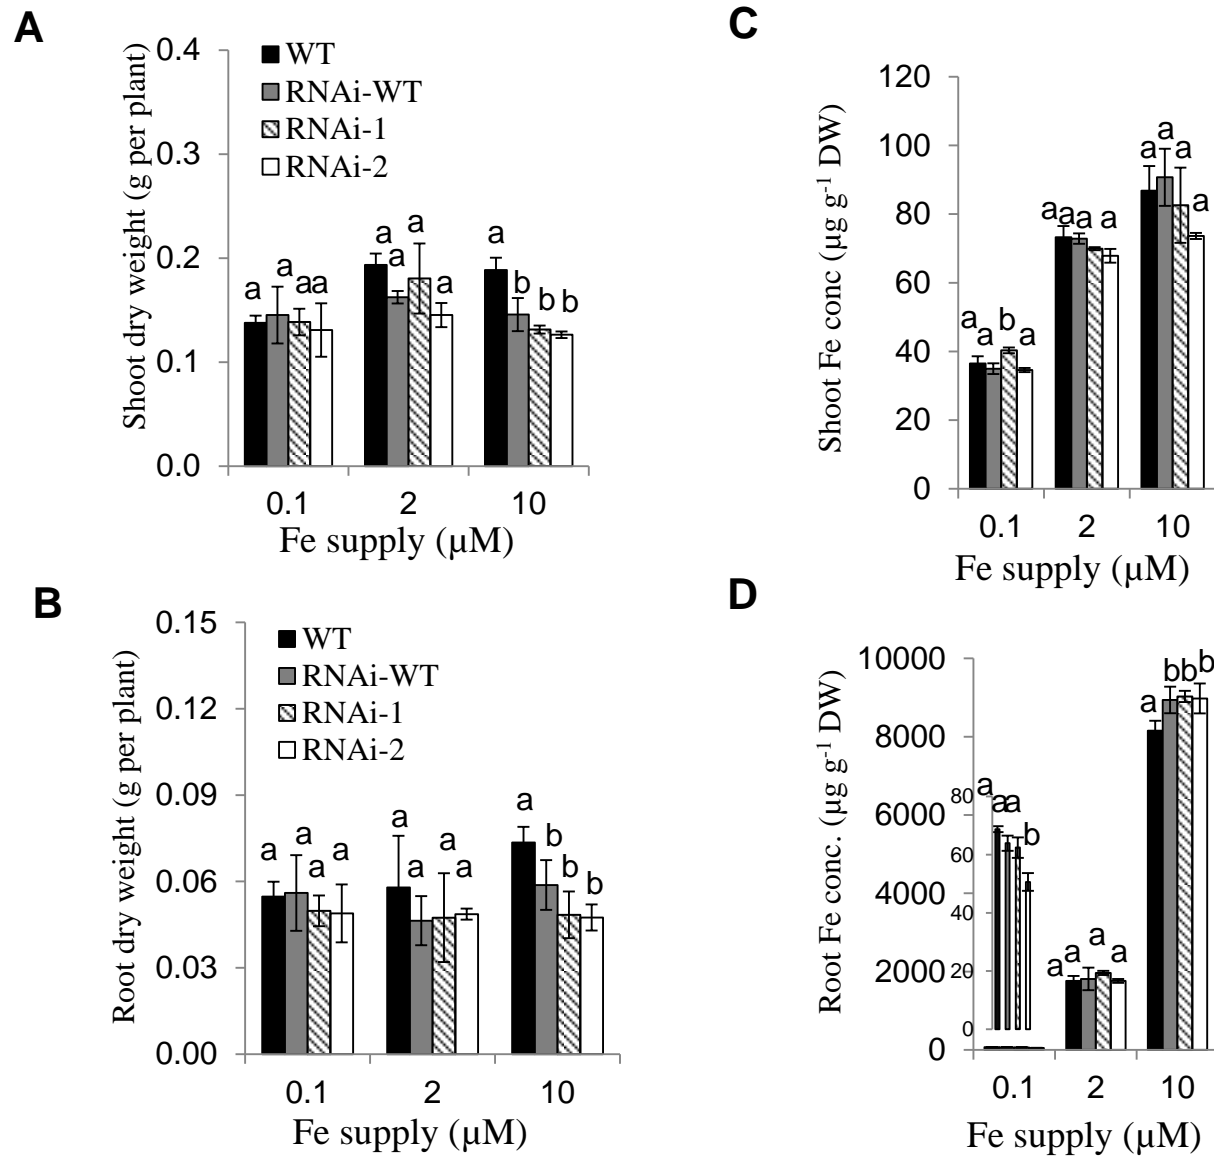

**Fig. S5 Phenotypic analysis of *HvNramp5* RNAi lines at different Fe concentrations**

Wild-type (WT) barley (cv. Golden Promise), the homozygous wild type (RNAi-WT) and two homozygous transgenic RNAi lines (RNAi-1, RNAi-2) derived from two independent events were cultivated in a nutrient solution containing 0.1, 2 or 10 μM FeSO<sub>4</sub> for 14 d. Dry weight of the roots (A) and shoots (B) was recorded. Concentration of Fe in the shoots (C) and roots (D) was determined by ICP-MS. Data are means ± SD of three biological replicates and different small letter indicates significant difference at  $p < 0.05$  by Tukey's test.
